# Supplementary material
Source: Springer Nature journal article supplement (http://www.springermedizin.de/resource/supplementary/13075_2011_3850_MOESM3_ESM.pdf/9694858)

A

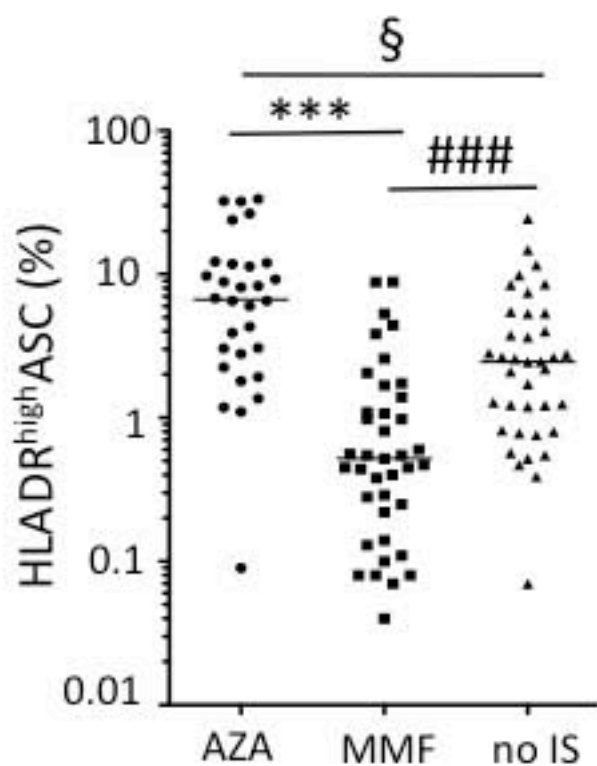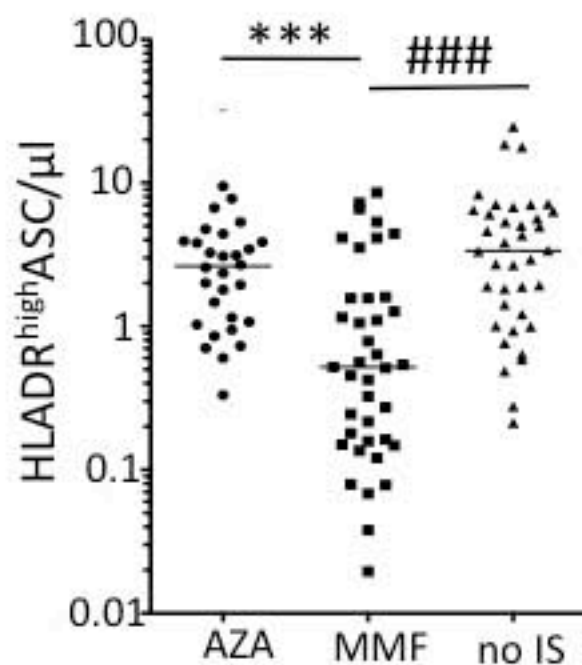

B

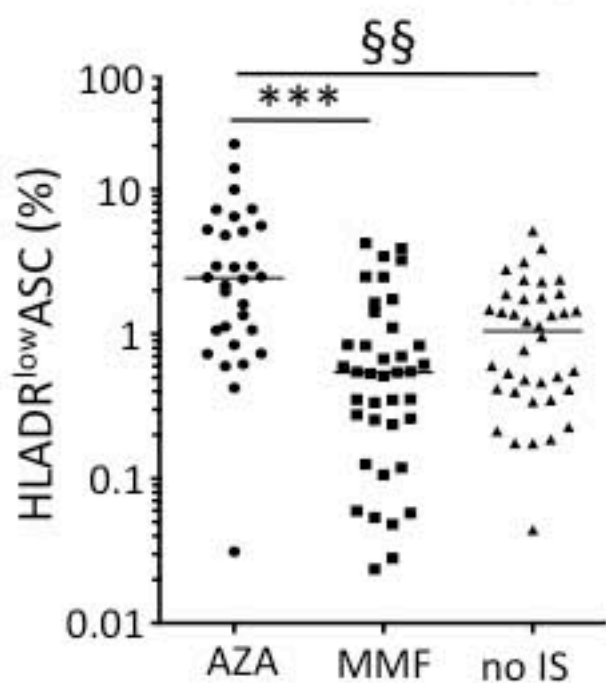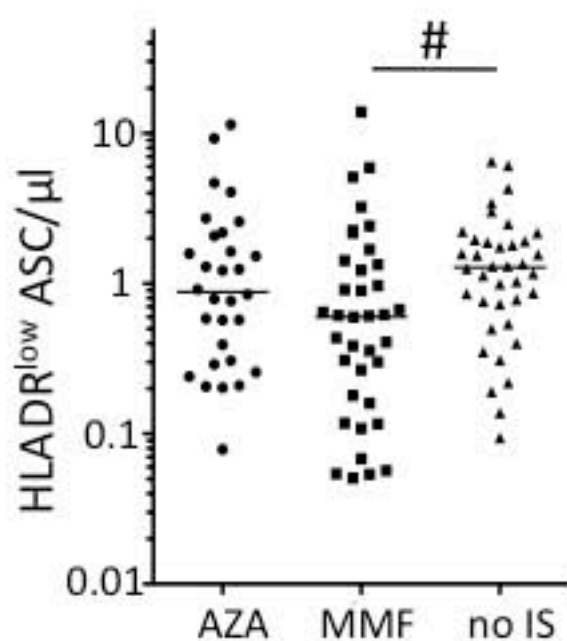

C

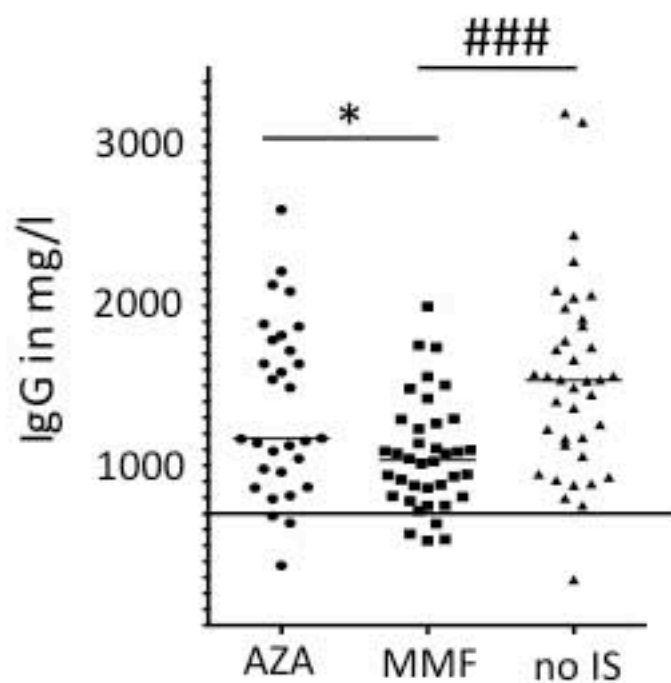

Supplement: MOESM3 [file 9694858]
